# Supplementary material for: Moho depths beneath the European Alps: a homogeneously processed map and receiver functions database
Source: Copernicus journal article supplement (doi:10.5194/essd-15-2117-2023), 2023-05-24

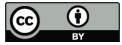

*Supplement of*

## **Moho depths beneath the European Alps: a homogeneously processed map and receiver functions database**

**Konstantinos Michailos et al.**

*Correspondence to:* Konstantinos Michailos ([konstantinos.michailos@unige.ch](mailto:konstantinos.michailos@unige.ch), [konstantinos.michailos@gmail.com](mailto:konstantinos.michailos@gmail.com))

The copyright of individual parts of the supplement might differ from the article licence.

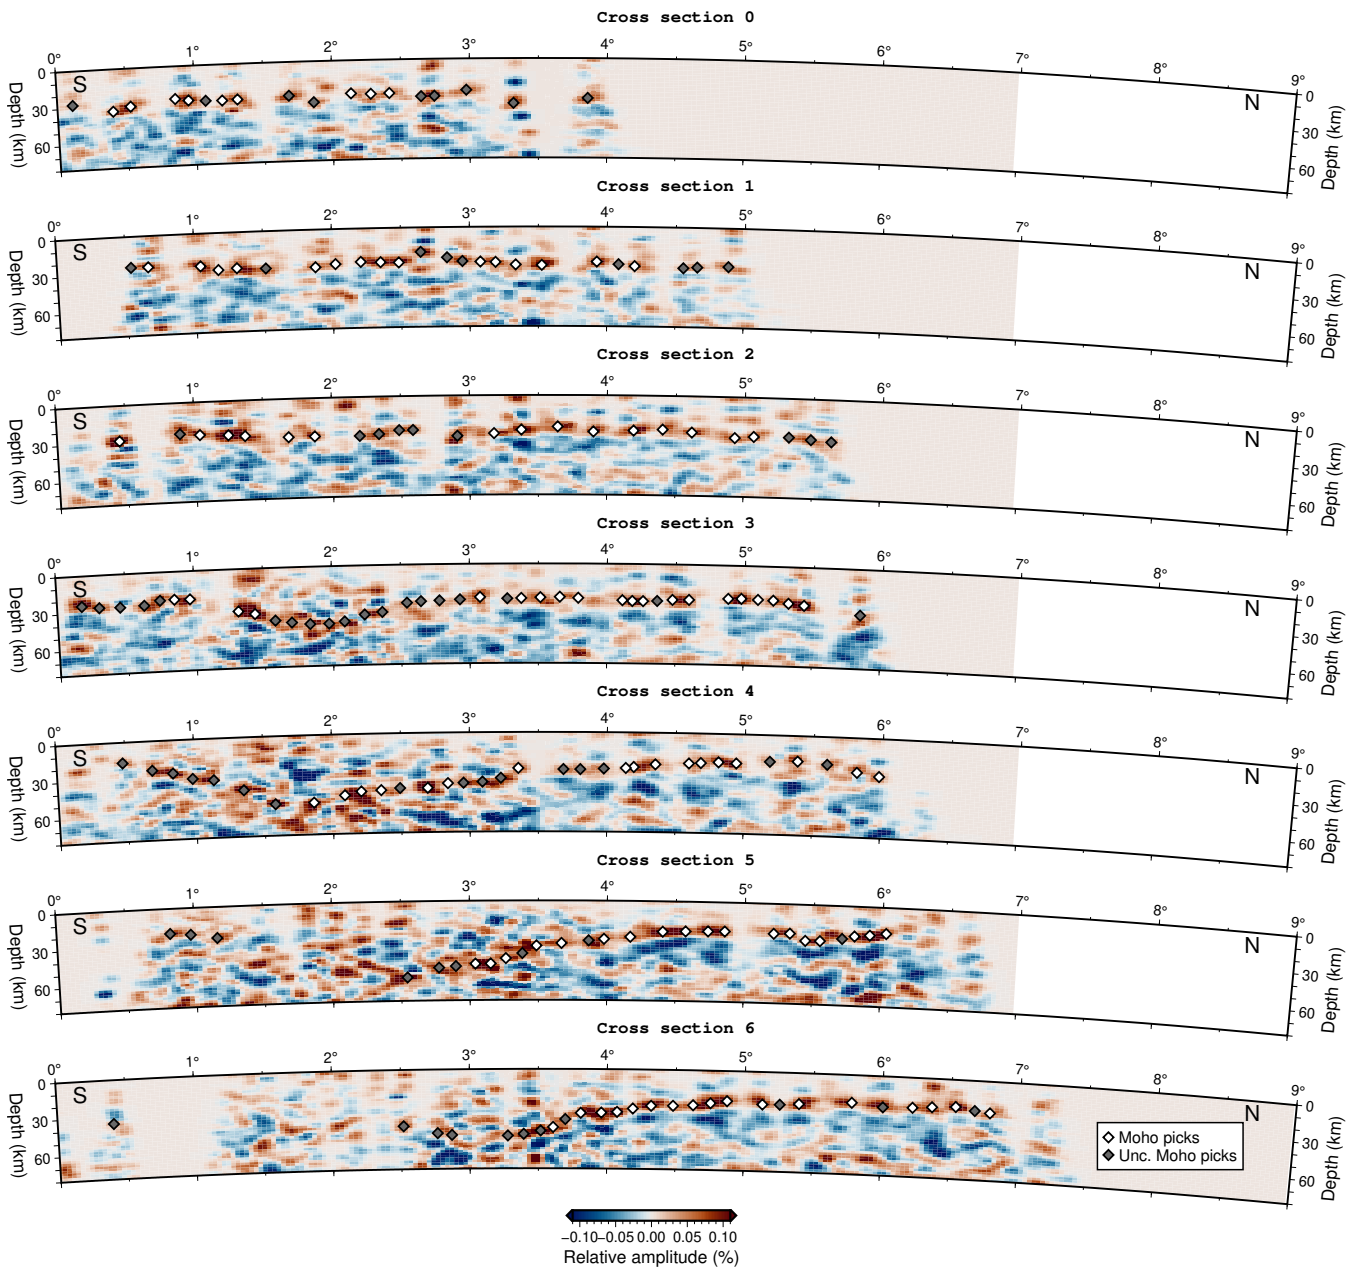



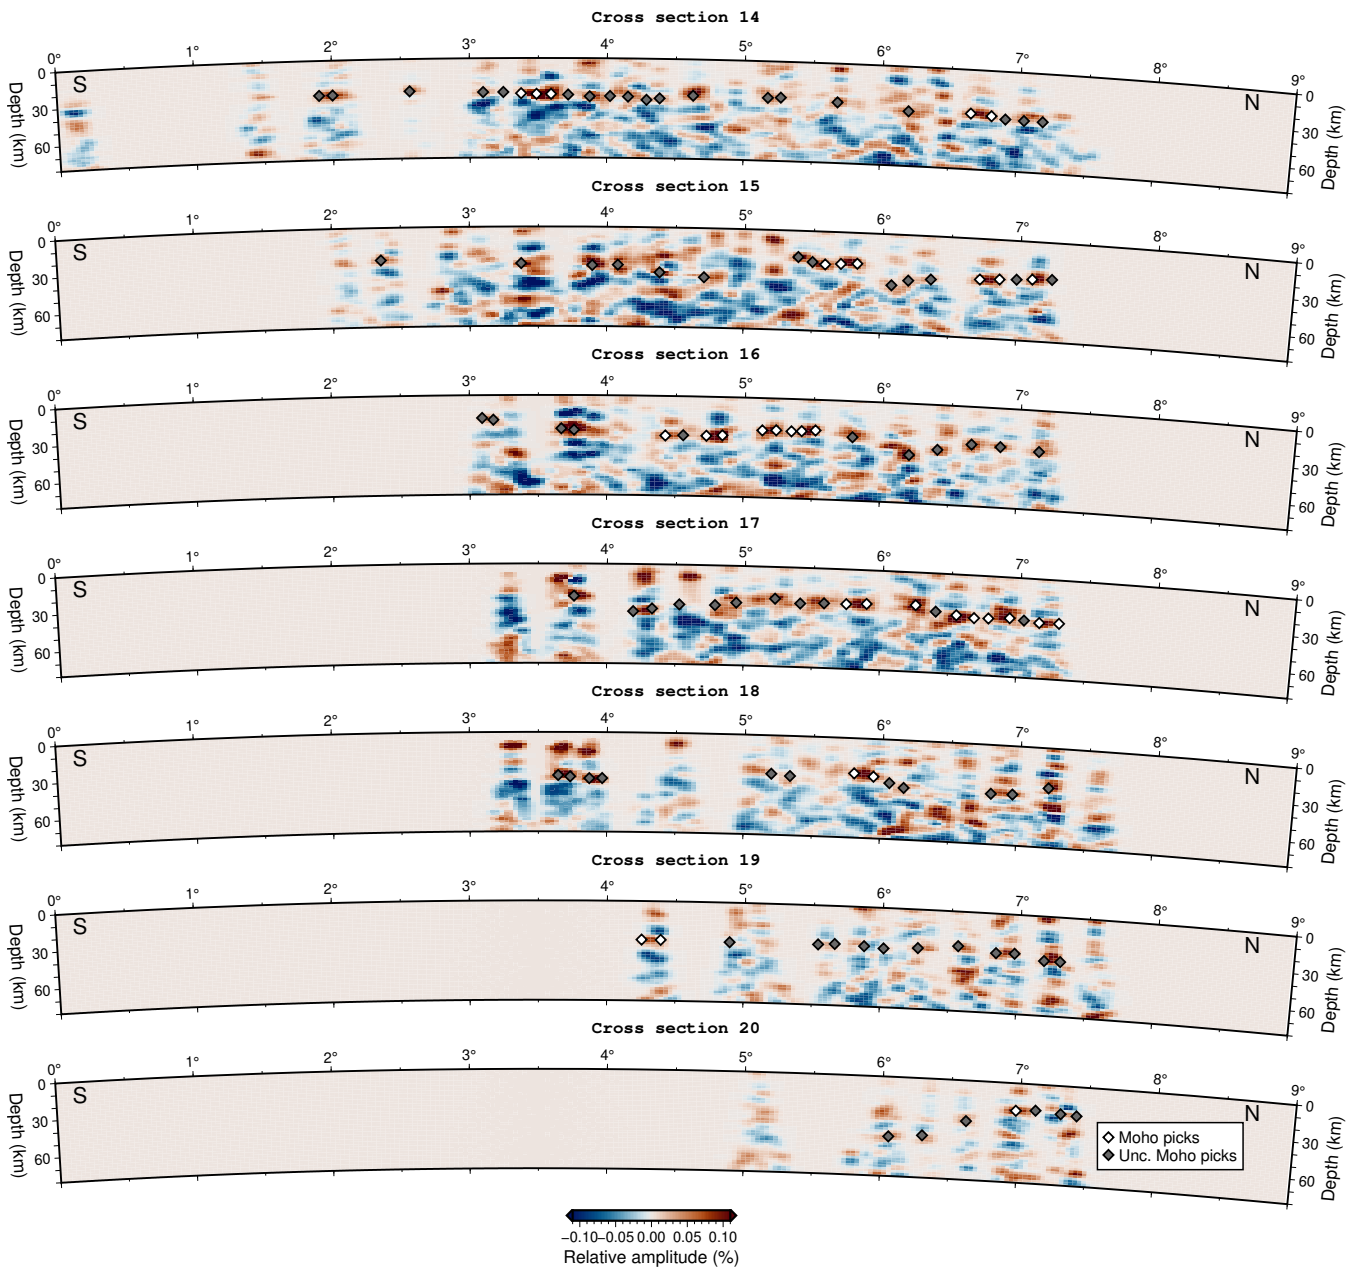

Supplement: Supplementary file 1 [file essd-15-2117-2023-supplement.pdf]
